# Supplementary material
Source: MDPI journal article supplement (https://www.mdpi.com/2311-5637/9/2/170)
Supplement: s1 [file s1]

Supplementary Material

# High gravity fermentation for bioethanol production from industrial spend black cherry brine supplemented with whey

Javier Ricardo Gómez Cardozo, Jean-Baptiste Beigbeder, Julia M. M. Dantas, and Jean-Michel Lavoie\*

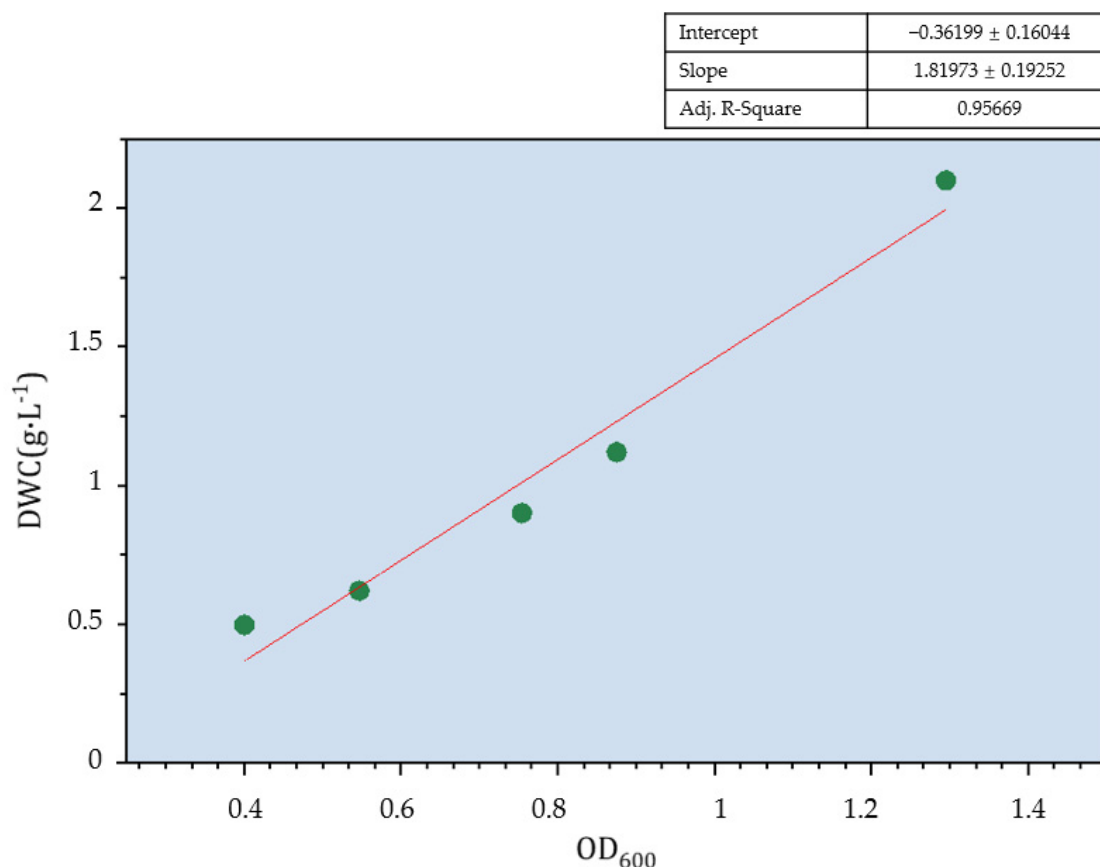

**Figure S1.** Dry Cell Weight (DWC) versus Optical Density at 600 nm (OD<sub>600</sub>) of *Saccharomyces cerevisiae*.

**Table S1.** Analysis of minerals present in whey.

| Element (Symbol) | Concentration (ppm) |
|------------------|---------------------|
| Sodium (Na)      | 648.0 ± 10.0        |
| Magnesium (Mg)   | 86.7 ± 1.2          |
| Potassium (K)    | 1667.0 ± 21.0       |
| Calcium (Ca)     | 89.1 ± 3.3          |
| Manganese (Mn)   | <1.0                |
| Iron (Fe)        | <1.0                |
| Zinc (Zn)        | <1.0                |
